# Supplementary material for: MicroRNA Expression for Early Prediction of Late Occurring Hematologic Acute Radiation Syndrome in Baboons
Source: PLoS One. 2016 Nov 15;11(11):e0165307. doi: 10.1371/journal.pone.0165307 (PMC5113049; doi:10.1371/journal.pone.0165307)
Supplement: S1 Table — Based on a literature search, we also examined the current state of knowledge about the association of these miRNAs with radiation exposure (right part of the table). If only a related microRNA was mentioned in literature, then the name is given in the "effect" column. The search term was the name of the microRNA in the PubMed database plus the term "Radiation". If no results were found the search was repeated with the name of the microRNA only. The titles and abstracts were searched for matches. If no results were found, a PubMed Central® search was done. If mirBase described previous IDs, then the search was repeated for these, too. When using a miRNA acronym combined with the term “Radiation” some important citations were missing, which could be completed thanks to highly appreciated inputs of our unknown reviewers. (XLS) [file pone.0165307.s001.xls]

## Sheet: Tabelle2
	miRBase literature search
	Gene ID	Sequence		Effect		Exposure		Reference
	known biological function
	miR-145	CACCUUGUCCUCACGGUCCAGUUUUCCCAGGAAUCCCUUAGAUGCUAAGAUGGGGAUUCCUGGAAAUACUGUUCUUGAGGUCAUGGUU		Upregulation in mouse spleen after IR was suppressed by Gamma-Tocotrienol		4 & 8 Gy x-ray		Ghosh & Pathak et al. Radiat Res 2016
				Reduced repair efficiency of radiation-up-regulated DNA double-strand breaks in in human prostate cancer cells in vivo and in vitro		2 Gy for cells, for organs 66 Gy local exposure fractioned		Gong, Zhang, He, & Hsieh, Radiat Res 2015
				An over-expression in human cervical cancer cells enhances radiosensitivity in vitro and in vivo (xenograft)		8 Gy for cells, 24 Gy for animal IR		Ye et al. FEBS Letters 2015
				miR-145-3p predicts pathologic complete response (pCR) to neoadjuvant chemoradiation in esophageal adenocarcinoma (human)		local exposure, 50,4 Gy fractioned		Skinner et al., Cancer 2014
	miR-151a-5p	UCGAGGAGCUCACAGUCUAGU		miR-151a-5p enhances dissemination and migration of malignant cells (human squamous cell carcinoma of the human head and neck and brain tumor cell lines) in vitro		2 Gy		Niemoeller et al., Radiat Oncol 2011
	miR-30d	AAGGAGCUCACAGUCUAUUGAG		Is up-regulated at 8 h after irradiation in human lymphoblast cells in vitro		x-ray 2 Gy		Chaudhry et al. J Radiat Res. 2013
				Tumor suppressor involved in mitochondrial fission and cell apoptosis, cellular senescence,cell growth and differentiation in human hematopoietic and osteoblast cells in vitro		γ-radiation 2 or 8 Gy		Li et al. PLoS One 2012
	miR-26b-3p	CCUGUUCUCCAUUACUUGGCUC		Mir-26b coordinates the regulation of ATF2 and the MAPK signaling pathway (cell proliferation and survival) in response to irradiation in human lung cancer cells in vitro		γ-radiation 2 Gy		Arora et al. PLoS One 2011
	miR-191	CGGCUGGACAGCGGGCAACGGAAUCCCAAAAGCAGCUGUUGUCUCCAGAGCAUUCCAGCUGCGCUUGGAUUUCGUCCCCUGCUCUCCUGCCU		Oncogenic and overexpressed in human non-small cell lung cancer cell lines in vitro		γ-radiation 8 Gy		Liu, Huang, Cancer Cell Int. 2015
				Upregulated 8 and 24 h after irradiation in human lymphoblast cells in vitro		x-ray 2 Gy		Chaudhry et al. J Radiat Res. 2013
	miR-20a	GUAGCACUAAAGUGCUUAUAGUGCAGGUAGUGUUUAGUUAUCUACUGCAUUAUGAGCACUUAAAGUACUGC		Upregulation in Bel-7402 and SMMC-7721 cells enhances their radioresistance to the effect of ionizing radiation		x-ray 2, 4, 6, 8 Gy		Zhang Y et al. Int J Radiat Oncol Biol Phys. 2015
				Upregulated in primary human dermal microvascular endothelial cells (HDMEC) after ionizing radiation		2 Gy		Mechthild Wagner-Ecker Radiation Oncology 2010
	miR-451	CUUGGGAAUGGCAAGGAAACCGUUACCAUUACUGAGUUUAGUAAUGGUAAUGGUUCUCUUGCUAUACCCAGA		High levels of miR-451 expression enhanced radiosensitivity in NPC cells by inhibiting the repair of irradiation-up-regulated double-strand breaks (DSBs) and increasing apoptosis.		x-ray 6 Gy		Zhang T et al. Tumour Biol. 2014
	miR-744-3p	CUGUUGCCACUAACCUCAACCU		Upregulation in mouse kidneys 24 hours after IR and hemorrhagie		γ-radiation 8,75 Gy + hemorrhagie		Kiang et al. PLoS One 2015
				Inhibits multiple components of DNA damage response and DNA repair and acts as radiosensitizer in human prostate cancer cell lines		γ-radiation 4 Gy		Hatano et. al. Nucleic Acids Res. 2015
	up-/down-regulated after irradiation
	miR-378a	AGGGCUCCUGACUCCAGGUCCUGUGUGUUACCUAGAAAUAGCACUGGACUUGGAGUCAGAAGGCCU		miR-378c is upregulated at 8 h after irradiation in human lymphoblast cells in vitro		x-ray 2 Gy		Chaudhry et al. J Radiat Res. 2013
	let-7d	CCUAGGAAGAGGUAGUAGGUUGCAUAGUUUUAGGGCAGGGAUUUUGCCCACAAGGAGGUAACUAUACGACCUGCUGCCUUUCUUAGG		Up- and down-regulated in glioblastoma cells.		3 Gy of x-rays		Chaudhry et al. DNA AND CELL BIOLOGY 2010
				Upregulated in human lymphoblast cell line TK6 following x-ray exposure		2 Gy x-ray		Chaudhry and R. A. Omaruddin; Molecular Biology, 2012
				Upregulated in Normal Human Thyroid Cells after exposure to radiation		1 and 10 Gy of γ-radiation		Nikiforova et al. DNA Cell Biol. 2014
	miR-29a	AUGACUGAUUUCUUUUGGUGUUCAGAGUCAAUAUAAUUUUCUAGCACCAUCUGAAAUCGGUUAU		Plasma circulating miR-29a-3p was downregulated and correlated with delivered radiation dose		54-70 Gy		Dinh et al. Radiat Oncol. 2016
	miR-29c-3p	UAGCACCAUUUGAAAUCGGUUA		Upregulation in irradiated CD133+ A172 cells		x-ray 60-Gy		Tokudome et al. Oncol Lett. 2015
	miR-628-5p	AUGCUGACAUAUUUACUAGAGG		Upregulated 24h after irradiation in EA.hy926 cells		2.5 Gy γ-radiation		Kraemer et al. Radiation Research 2011
	miR-146a	CCGAUGUGUAUCCUCAGCUUUGAGAACUGAAUUCCAUGGGUUGUGUCAGUGUCAGACCUCUGAAAUUCAGUUCUUCAGCUGGGAUAUCUCUGUCAUCGU		Upregulated in human lymphoblast cell line TK6 cells		2 Gy of x-ray		Chaudhry et al. J Radiat Res. 2013
				Upregulated by single-dose and multi-fractionated irradiation in Human Coronary Artery Endothelial Cells		x-ray 10 Gy or 5 fractions of 2 Gy		Sanjeewani, Palayoor et al. Mol Cancer Res. 2014
	miR-342-3p	AUGCUGACAUAUUUACUAGAGG		Upregulated by ionizing irradiation in human skin primary keratinocytes		6 Gy γ-radiation		Joly-Tonetti et al. BMC Genomics 2013
	miR-93-3p	ACUGCUGAGCUAGCACUUCCCG		Downregulation in radioresistant human nasopharyngeal carcinoma cell lines in vitro		2-8 Gy		Li et al. PLoS One 2013
	miR-185	AGGGGGCGAGGGAUUGGAGAGAAAGGCAGUUCCUGAUGGUCCCCUCCCCAGGGGCUGGCUUUCCUCUGGUCCUUCCCUCCCA		Upregulated in radiation-injured mice compared to SHAM mice		9.5 Gy γ-radiation		Aminul Islam et al. PLoS One 2015
				Downregulated by all radiation doses in clinical renal cell carcinoma tissues		2 Gy of x-rays or carbon ions		J Wang et al. Cell Death and Disease 2013
	miR-142-5p	CAUAAAGUAGAAAGCACUACU		Downregulation at 2 Gy in mouse serum		2, 6,5 and 8 Gy γ-radiation		Acharya et al. Sci Transl Med 2015
				Downregulation in human colon cancer cell lines		2 Gy and Irinotecan		Panthak et al. Oncotarget 2015
				Upregulated 8 and 24h after irradiation in human lymphoblast cells in vitro		x-ray 2 Gy		Chaudhry et al. J Radiat Res. 2013
				Upregulated only in bystander human lymphoblast cell lines (medium exchanged bystander effect model system)				Chaudhry, Omaruddin, Mol Biol (Mosk) 2012
				Upregulated in human glioma cell lines		x-ray 3 Gy		Chaudhry et al. DNA Cell Biol. 2010
	miR-19a	GCAGUCCUCUGUUAGUUUUGCAUAGUUGCACUACAAGAAGAAUGUAGUUGUGCAAAUCUAUGCAAAACUGAUGGUGGCCUGC		Upregulated in glioblastoma cells.		3 Gy of x-rays		Chaudhry et al. DNA AND CELL BIOLOGY 2010
				Upregulated in irradiated differentiated keratinocyte		6 Gy γ-radiation		Joly-Tonetti et al. BMC Genomics 2013
				Downregulated in Human Coronary Artery Endothelial Cells after multi-fractionated irradiation at 24h		x-ray 5 fractions of 2 Gy		Sanjeewani T. Palayoor et al. Mol Cancer Res. 2014
	miR-25	GGCCAGUGUUGAGAGGCGGAGACUUGGGCAAUUGCUGGACGCUGCCCUGGGCAUUGCACUUGUCUCGGUCUGACAGUGCCGGCC		Deregulated in six malignant (SCC-4, SCC-25, CAL-27, LN229, T98G, U-87 MG) cell lines following radiation		x-ray 2 Gy		Niemoeller et al. Radiation Oncology 2011
	miR-30a-5p	UGUAAACAUCCUCGACUGGAAG		miR-30a showed an increased expression following TBI		10 Gy		Cui et al. PLoS ONE 2011
	miR-378-1	AGGGCUCCUGACUCCAGGUCCUGUGUGUUACCUCGAAAUAGCACUGGACUUGGAGUCAGAAGGCCU		miR-378 showed an increasing level of induction		2 Gy		Chaudhry et al. J Radiat Res. 2013
	unknown function
	miR-18a-3p	ACUGCCCUAAGUGCUCCUUCUGG
	miR-28-5p	AAGGAGCUCACAGUCUAUUGAG
	miR-149	GCCGGCGCCCGAGCUCUGGCUCCGUGUCUUCACUCCCGUGCUUGUCCGAGGAGGGAGGGAGGGACGGGGGCUGUGCUGGGGCAGCUGGA
	miR-1267	CUCCCAAAUCUCCUGUUGAAGUGUAAUCCCCACCUCCAGCAUUGGGGAUUACAUUUCAACAUGAGAUUUGGAUGAGGA
	miR-151a-3p	CUAGACUGAAGCUCCUUGAGG
	miR-204	CUAGACUGAAGCUCCUUGAGG
	miR-339-3p	UGAGCGCCUCGACGACAGAGCCG
	miR-409-3p	GAAUGUUGCUCGGUGAACCCCU
	miR-29a	AUGACUGAUUUCUUUUGGUGUUCAGAGUCAAUAUAAUUUUCUAGCACCAUCUGAAAUCGGUUAU
	miR-422a	GAGAGAAGCACUGGACUUAGGGUCAGAAGGCCUGAGUCUCUCUGCUGCAGAUGGGCUCUCUGUCCCUGAGCCAAGCUUUGUCCUCCCUGG
	miR-584	UAGGGUGACCAGCCAUUAUGGUUUGCCUGGGACUGAGGAAUUUGCUGGGAUAUGUCAGUUCCAGGCCAACCAGGCUGGUUGGUCUCCCUGAAGCAAC
	miR-652	ACGAAUGGCUAUGCACUGCACAACCCUAGGAGAGGGUGCCAUUCACAUAGACUAUAAUUGAAUGGCGCCACUAGGGUUGUGCAGUGCACAACCUACAC
	If only a related microRNA ist mentioned in literatur the name is given in the "effect" column.
	The search term was the name of the microRNA in the PubMed database plus the term "Radiation". If no results were found the search was repeated only with the name of the microRNA. The titels and abstracts were searched for matches. If no results were found either, a PubMed Central® search was done. The search term was the name of the microRNA in the PubMed database plus the term "Radiation". If n…
	If mirBase describes previous Ids the search was repeated for these, too.

## Sheet: Tabelle3
	miRBase			literature search
	Gene ID	sequence		effect	exposure		reference
